# Supplementary material for: Amino Acid-Coated Zeolitic Imidazolate Framework for Delivery of Genetic Material in Prostate Cancer Cell
Source: MDPI journal article supplement (doi:10.3390/molecules28124875), 2023-06-20
Supplement: s1 [file s1]

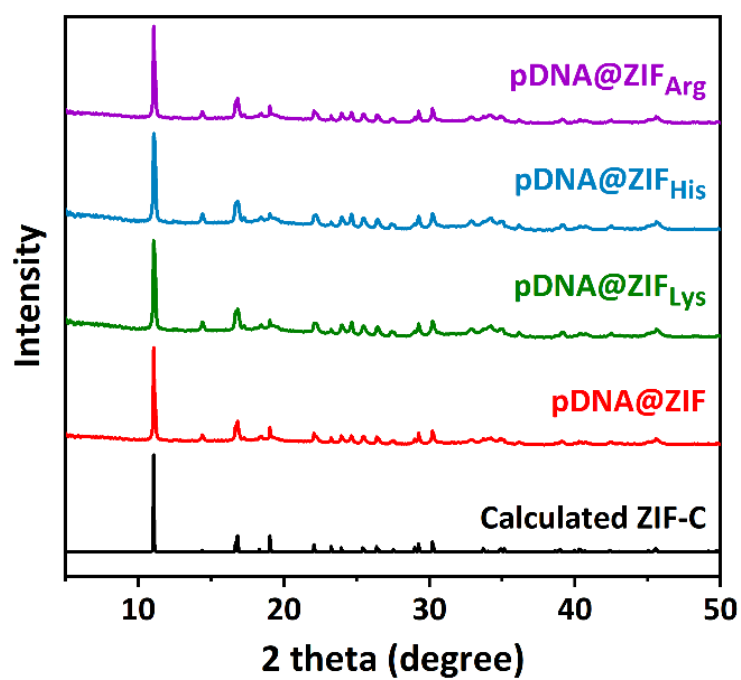

**Figure S1.** XRD of pDNA@ZIF functionalized with 1000  $\mu\text{M}$  of amino acids.

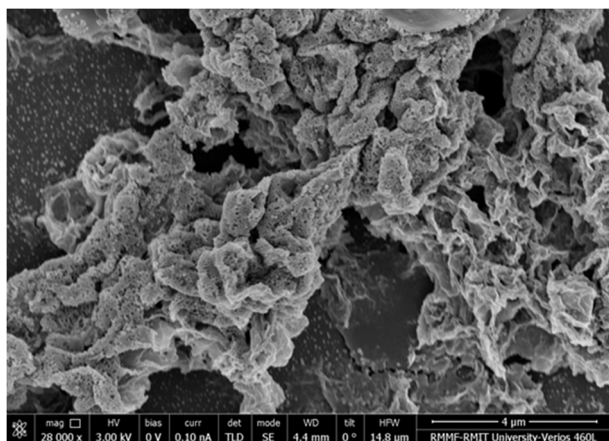

**Figure S2.** SEM images of ZIF-C.

**Cytotoxicity:** Approximately 7500 and 5000 cells/well PC-3 were seeded in 96 well plates for 72 h and 96 h treatment respectively. The cells were incubated for 24 h in humidified 5% CO<sub>2</sub> at 37°C incubator. The same experimental steps described in section 3.8 was followed to conduct cytotoxicity at 72 h and 96 h.

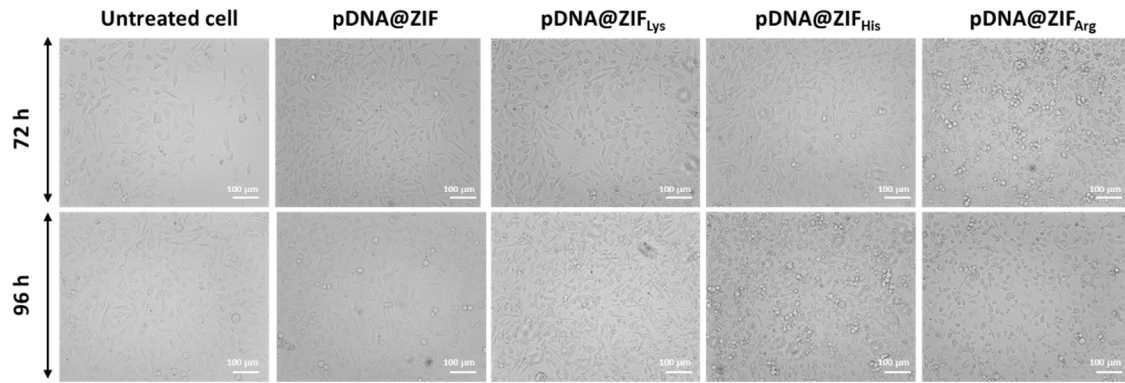

**Figure S3.** Phase contrast images of cells taken in phase contrast and fluorescence microscope.
